# Supplementary material for: A simulated observation database to assess the impact of IASI-NG hyperspectral infrared sounder
Source: Copernicus journal article supplement (doi:10.5194/amt-2017-266), 2017-09-18
Supplement: Supplementary file [file amt-2017-266-AC1-supplement.pdf]

*Please note that the following paper discusses the added-value of one possible configuration of IASI-NG in the characterisation of the lower troposphere in terms of the ozone concentration: Sellitto, P., Dufour, G., Eremenko, M., Cuesta, J., Dauphin, P., Forêt, G., Gaubert, B., Beekmann, M., Peuch, V.-H., and Flaud, J.-M.: Analysis of the potential of one possible instrumental configuration of the next generation of IASI instruments to monitor lower tropospheric ozone, Atmos. Meas. Tech., 6, 621-635, <https://doi.org/10.5194/amt-6-621-2013>, 2013. Even if your paper does not directly address the topic of air quality, I think that citing this work would be useful when discussing your results (and IASI-NG expected added-value), see e.g. this sentence in your conclusions: "A reduced sensitivity in the low troposphere is confirmed for IASI and, additional work is required to check if IASI-NG will be able to better probe the atmosphere at these levels."*

We would like to thank Pasquale Sellitto for his helpful suggestion to include this reference to the improvement brought by IASI-NG for the determination of ozone concentration in the low troposphere. The text will be changed as following : « A reduced sensitivity in the low troposphere is confirmed for IASI. This result agree with the study by Sellitto et al 2014 who produced tropospheric ozone pseudo-observations based on this noise configurations. They showed a clear improvement of low tropospheric ozone pseudo-observations compared to the IASI ones and the potential to separate lower from upper tropospheric ozone information. Additionall work is thus required to check if IASI-NG will be able to better probe the atmosphere at these levels ».

*In addition, I also suggest to open your discussion to possible multi-spectral synergies, with reference to the following paper: "Costantino, L., Cuesta, J., Emili, E., Coman, A., Foret, G., Dufour, G., Eremenko, M., Chailleux, Y., Beekmann, M., and Flaud, J.-M.: Potential of multispectral synergism for observing ozone pollution by combining IASING and UVNS measurements from the EPS-SG satellite, Atmos. Meas. Tech., 10, 1281-1298, <https://doi.org/10.5194/amt-10-1281-2017>, 2017." I suggest adding these two references to put your very useful work in a slightly wider context.*

We can open the discussion if the editor agrees with this suggestion. We will add this short paragraph at the end of the conclusions

« IASI-NG is dedicated to mutiple applications such as NWP, atmospheric chemistry and air quality. The potential of synergy between instruments from EPS second Generation should be studied for the various application such as ozone pollution as proposed by Costantino et al. (2017). »
